# Supplementary material
Source: publisher figshare collection journal article supplement (https://asha.figshare.com/articles/dataset/_/27947940)
Supplement: Supplementary file 1 [file 2]

**Supplemental Material S2.** The distribution of participant responses on items related to roles and responsibilities of teachers' unions in the negative.

| Would you favor or oppose the union taking on the following functions?                          | <i>n</i> | Mean | <i>SD</i> | Strongly favor | Somewhat favor | Somewhat oppose | Strongly oppose | I am not sure |
|-------------------------------------------------------------------------------------------------|----------|------|-----------|----------------|----------------|-----------------|-----------------|---------------|
| Effectively negotiate contracts, salary, and benefits on behalf of speech-language pathologists | 192      | 2.03 | 1.28      | 45%            | 32%            | 6%              | 7%              | 10%           |
| Keep speech-language pathologists updated on new evidence-based practices                       | 254      | 2.72 | 1.36      | 23%            | 28%            | 15%             | 21%             | 13%           |
| Negotiate to keep caseload size down in the district                                            | 270      | 1.53 | 0.97      | 67%            | 23%            | 2%              | 4%              | 4%            |
| Protect speech-language pathologists through due process and grievance procedures               | 150      | 1.95 | 1.37      | 54%            | 27%            | 1%              | 5%              | 13%           |
| Provide support and mentoring to new speech-language pathologists                               | 249      | 2.61 | 1.39      | 27%            | 30%            | 12%             | 17%             | 14%           |
| Provide speech-language pathologists with high-quality training and professional development    | 238      | 2.45 | 1.42      | 35%            | 26%            | 11%             | 15%             | 13%           |
| Expand the career ladder for speech-language pathologists by                                    | 269      | 2.20 | 1.38      | 40%            | 33%            | 7%              | 6%              | 14%           |

|                                                                                                 |     |      |      |     |     |     |     |     |
|-------------------------------------------------------------------------------------------------|-----|------|------|-----|-----|-----|-----|-----|
| negotiating new and differentiated roles and responsibilities                                   |     |      |      |     |     |     |     |     |
| Guide ineffective teachers and speech-language pathologists out of the profession               | 281 | 3.07 | 1.55 | 19% | 30% | 8%  | 12% | 31% |
| Lead efforts to identify ineffective teachers and speech-language pathologists and retrain them | 263 | 2.82 | 1.55 | 24% | 34% | 6%  | 10% | 26% |
| Negotiate new ways to more meaningfully and effectively evaluate speech-language pathologists   | 248 | 2.44 | 1.41 | 32% | 33% | 10% | 10% | 15% |

---
