# Supplementary material
Source: publisher figshare collection journal article supplement (https://asha.figshare.com/articles/dataset/_/27947940)
Supplement: Supplementary file 2 [file 2]

**Supplemental Material S4.** A snapshot of district collective bargaining agreements and speech-language pathologist provisions across the state of Florida.

| District  | Year(s)   | # of pages | SLPs referenced | SLP Provisions              |          |               |                        |            |       |
|-----------|-----------|------------|-----------------|-----------------------------|----------|---------------|------------------------|------------|-------|
|           |           |            |                 | Contracts, salary, benefits | PD, CEUs | Caseload size | Support and mentorship | Evaluation | Other |
| Alachua   | 2021-2024 | 90         | Yes             | Yes                         | NE       | NE            | NE                     | NE         | NE    |
| Baker     | 2021-2024 | 59         | Yes             | Yes                         | NE       | NE            | NE                     | NE         | NE    |
| Bay       | 2020-2023 | 107        | No              | NE                          | NE       | NE            | NE                     | NE         | NE    |
| Bradford  | 2019-2022 | 84         | Yes             | Yes                         | NE       | NE            | NE                     | NE         | Yes   |
| Brevard   | 2021-2022 | 90         | Yes             | Yes                         | NE       | NE            | NE                     | NE         | NE    |
| Broward   | 2021-2024 | 220        | Yes             | Yes                         | Yes      | NE            | Yes                    | NE         | Yes   |
| Calhoun   | 2019-2022 | 46         | No              | NE                          | NE       | NE            | NE                     | NE         | NE    |
| Charlotte | 2019-2022 | 150        | Yes             | NE                          | NE       | NE            | NE                     | Yes        | NE    |

|          |           |     |     |     |    |     |    |    |     |
|----------|-----------|-----|-----|-----|----|-----|----|----|-----|
| Citrus   | 2019-2022 | 53  | Yes | Yes | NE | NE  | NE | NE | NE  |
| Clay     | 2022-2024 | 129 | Yes | Yes | NE | NE  | NE | NE | NE  |
| Collier  | 2019-2022 | 71  | Yes | Yes | NE | NE  | NE | NE | Yes |
| Columbia | 2019-2022 | 68  | Yes | NE  | NE | NE  | NE | NE | Yes |
| Dade     | 2020-2023 | 274 | Yes | Yes | NE | NE  | NE | NE | Yes |
| DeSoto   | 2021-2024 | 87  | No  | NE  | NE | NE  | NE | NE | NE  |
| Dixie    | NA        | NA  | NA  | NA  | NA | NA  | NA | NA | NA  |
| Duval    | 2020-2023 | 122 | Yes | Yes | NE | NE  | NE | NE | Yes |
| Escambia | 2021-2024 | 103 | Yes | Yes | NE | NE  | NE | NE | Yes |
| Flagler  | 2019-2022 | 72  | Yes | Yes | NE | NE  | NE | NE | NE  |
| Franklin | 2020-2023 | 50  | Yes | NE  | NE | Yes | NE | NE | NE  |
| Gadsden  | 2019-2022 | 52  | No  | NE  | NE | NE  | NE | NE | NE  |

|              |           |     |     |     |     |     |    |    |     |
|--------------|-----------|-----|-----|-----|-----|-----|----|----|-----|
| Gilchrist    | NA        | NA  | NA  | NA  | NA  | NA  | NA | NA | NA  |
| Glades       | 2021-2024 | 29  | Yes | NE  | NE  | NE  | NE | NE | Yes |
| Gulf         | NA        | NA  | NA  | NA  | NA  | NA  | NA | NA | NA  |
| Hamilton     | 2021-2024 | 27  | No  | NE  | NE  | NE  | NE | NE | NE  |
| Hardee       | 2021-2024 | 78  | Yes | Yes | NE  | NE  | NE | NE | NE  |
| Hendry       | 2021-2024 | 57  | Yes | NE  | Yes | Yes | NE | NE | NE  |
| Hernando     | 2020-2023 | 57  | Yes | Yes | NE  | NE  | NE | NE | NE  |
| Highlands    | 2021-2024 | 80  | Yes | Yes | NE  | NE  | NE | NE | NE  |
| Hillsborough | 2019-2022 | 105 | Yes | Yes | NE  | Yes | NE | NE | Yes |
| Holmes       | NA        | NA  | NA  | NA  | NA  | NA  | NA | NA | NA  |
| Indian River | 2020-2023 | 110 | Yes | Yes | NE  | NE  | NE | NE | Yes |
| Jackson      | 2019-2022 | 44  | Yes | NE  | NE  | NE  | NE | NE | Yes |

|           |           |     |     |     |    |     |    |     |     |
|-----------|-----------|-----|-----|-----|----|-----|----|-----|-----|
| Jefferson | NA        | NA  | NA  | NA  | NA | NA  | NA | NA  | NA  |
| Lafayette | 2019-2022 | 51  | No  | NE  | NE | NE  | NE | NE  | NE  |
| Lake      | 2021-2022 | 106 | Yes | Yes | NE | NE  | NE | NE  | Yes |
| Lee       | 2020-2023 | 84  | Yes | Yes | NE | NE  | NE | NE  | Yes |
| Leon      | 2021-2024 | 52  | Yes | Yes | NE | NE  | NE | NE  | Yes |
| Levy      | 2020-2022 | 102 | Yes | Yes | NE | NE  | NE | NE  | NE  |
| Liberty   | NA        | NA  | NA  | NA  | NA | NA  | NA | NA  | NA  |
| Madison   | 2021-2024 | 47  | No  | NE  | NE | NE  | NE | NE  | NE  |
| Manatee   | 2017-2022 | 100 | Yes | NE  | NE | NE  | NE | NE  | Yes |
| Marion    | 2019-2022 | 84  | No  | NE  | NE | NE  | NE | NE  | NE  |
| Martin    | 2020-2023 | 80  | Yes | Yes | NE | NE  | NE | NE  | NE  |
| Monroe    | 2021-2022 | 204 | Yes | Yes | NE | Yes | NE | Yes | NE  |

|            |           |     |     |     |    |     |    |     |     |
|------------|-----------|-----|-----|-----|----|-----|----|-----|-----|
| Nassau     | 2021-2024 | 132 | Yes | Yes | NE | NE  | NE | NE  | Yes |
| Okaloosa   | 2021-2024 | 70  | Yes | Yes | NE | Yes | NE | NE  | NE  |
| Okeechobee | 2021-2023 | 81  | Yes | NE  | NE | NE  | NE | Yes | NE  |
| Orange     | 2021-2024 | 146 | Yes | Yes | NE | NE  | NE | NE  | Yes |
| Osceola    | 2021-2023 | 123 | Yes | Yes | NE | NE  | NE | NE  | NE  |
| Palm Beach | 2022-2024 | 73  | Yes | Yes | NE | NE  | NE | NE  | NE  |
| Pasco      | 2019-2022 | 87  | Yes | Yes | NE | NE  | NE | NE  | Yes |
| Pinellas   | 2022-2025 | 66  | Yes | NE  | NE | NE  | NE | NE  | Yes |
| Polk       | 2019-2022 | 117 | Yes | Yes | NE | NE  | NE | NE  | Yes |
| Putnam     | 2021-2024 | 80  | Yes | Yes | NE | NE  | NE | NE  | NE  |
| Santa Rosa | 2021-2022 | 62  | Yes | Yes | NE | NE  | NE | NE  | NE  |
| Sarasota   | 2021-2024 | 118 | No  | NE  | NE | NE  | NE | NE  | NE  |

|            |           |     |     |     |    |     |    |    |     |
|------------|-----------|-----|-----|-----|----|-----|----|----|-----|
| Seminole   | 2020-2023 | 78  | Yes | Yes | NE | Yes | NE | NE | NE  |
| St. Johns  | 2021-2024 | 111 | Yes | Yes | NE | NE  | NE | NE | NE  |
| St. Lucie  | 2022-2025 | 70  | No  | NE  | NE | NE  | NE | NE | NE  |
| Sumter     | 2019-2022 | 90  | Yes | Yes | NE | NE  | NE | NE | NE  |
| Suwannee   | NA        | NA  | NA  | NA  | NA | NA  | NA | NA | NA  |
| Taylor     | 2020-2023 | 52  | Yes | NE  | NE | Yes | NE | NE | Yes |
| Union      | NA        | NA  | NA  | NA  | NA | NA  | NA | NA | NA  |
| Volusia    | 2021-2024 | 81  | Yes | Yes | NE | Yes | NE | NE | NE  |
| Wakulla    | 2020-2023 | 41  | Yes | Yes | NE | Yes | NE | NE | NE  |
| Walton     | 2020-2023 | 64  | Yes | Yes | NE | NE  | NE | NE | NE  |
| Washington | 2021-2024 | 53  | Yes | Yes | NE | NE  | NE | NE | NE  |

|           |   |   |          |          |        |         |        |        |          |
|-----------|---|---|----------|----------|--------|---------|--------|--------|----------|
| Total (%) | – | – | 49 (73%) | 39 (58%) | 2 (3%) | 9 (13%) | 1 (1%) | 3 (4%) | 21 (31%) |
|-----------|---|---|----------|----------|--------|---------|--------|--------|----------|

---

Note. PD = professional development; NA = not applicable; NE = no evidence found.
