# Supplementary material
Source: publisher figshare collection journal article supplement (https://asha.figshare.com/articles/dataset/_/27947940)
Supplement: Supplementary file 3 [file 2]

**Supplemental Material S1.** The distribution of participant responses on items related to roles and responsibilities of teachers' unions  
in the affirmative

| How good of a job is the union or association in your district doing in the following areas?    | <i>n</i> | Mean | <i>SD</i> | Excellent | Good | Average | Poor | Terrible |
|-------------------------------------------------------------------------------------------------|----------|------|-----------|-----------|------|---------|------|----------|
| Effectively negotiate contracts, salary, and benefits on behalf of speech-language pathologists | 99       | 2.49 | 0.89      | 10%       | 46%  | 31%     | 11%  | 2%       |
| Keep speech-language pathologists updated on new evidence-based practices                       | 37       | 2.16 | 0.75      | 19%       | 49%  | 30%     | 2%   | 0%       |
| Negotiate to keep caseload size down in the district                                            | 19       | 3.53 | 1.43      | 11%       | 21%  | 10%     | 21%  | 37%      |
| Protect speech-language pathologists through due process and grievance procedures               | 138      | 2.40 | 0.65      | 7%        | 48%  | 43%     | 2%   | 0%       |
| Provide support and mentoring to new speech-language pathologists                               | 40       | 2.20 | 0.90      | 23%       | 43%  | 30%     | 2%   | 2%       |
| Provide speech-language pathologists with high-quality training and professional development    | 51       | 2.22 | 0.85      | 18%       | 51%  | 25%     | 4%   | 2%       |
| Expand the career ladder for speech-language pathologists by negotiating new and                | 20       | 2.80 | 1.08      | 10%       | 35%  | 25%     | 25%  | 5%       |

differentiated roles and responsibilities

|                                                                                                 |    |      |      |     |     |     |     |     |
|-------------------------------------------------------------------------------------------------|----|------|------|-----|-----|-----|-----|-----|
| Guide ineffective teachers and speech-language pathologists out of the profession               | 7  | 3.29 | 1.38 | 14% | 14% | 29% | 14% | 29% |
| Lead efforts to identify ineffective teachers and speech-language pathologists and retrain them | 23 | 2.70 | 1.08 | 9%  | 48% | 13% | 26% | 4%  |
| Negotiate new ways to more meaningfully and effectively evaluate speech-language pathologists   | 38 | 2.76 | 0.90 | 3%  | 42% | 37% | 13% | 5%  |

---
