# Supplementary material
Source: publisher figshare collection journal article supplement (https://asha.figshare.com/articles/dataset/_/27947940)
Supplement: Supplementary file 4 [file 2]

**Supplemental Material S3.** The Leximancer (2020) concept map and thematic analysis of free-text responses related to the significant benefits and barriers of teachers' union membership nominated by participants.

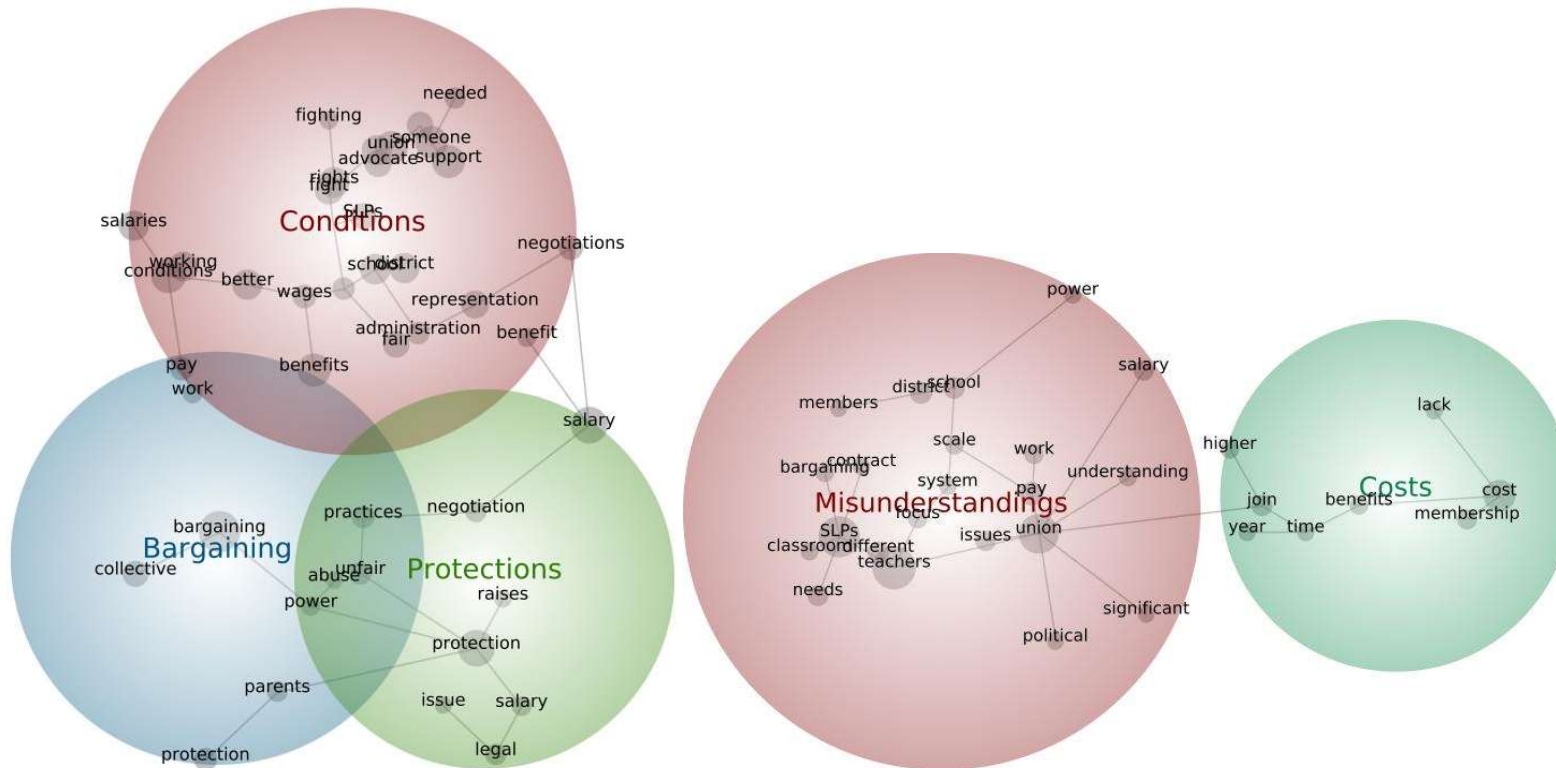

*Note.* The circles depict themes in responses related to benefits (left) and barriers (right) of teachers' union membership. Each word, depicted alongside a shaded circle, indicates a word that frequently occurred in free-text responses. The size of the circle reflects the frequency of occurrence with larger circles indicating more frequently occurring words or concepts than smaller circles.
